# Supplementary material for: Transcriptional regulation induced by cAMP elevation in mouse Schwann cells
Source: PubMed Central journal article supplement (PMC4834722; doi:10.1042/an20130031), 2014-04-30
Supplement: an006e142add01.pdf [file an006e142add01.pdf]

**Supplementary Table 1: Primer pairs used for qRT-PCR.** Analysis of mRNA expression levels by qRT-PCR was performed with the itemized primer pairs. Primer pairs were designed to overlap exon/intron junctions to prevent amplification of genomic DNA.

| Gene    | Sequence                                                               | Gene    | Sequence                                                                     |
|---------|------------------------------------------------------------------------|---------|------------------------------------------------------------------------------|
| 60s     | 5': GGA AGT ACC AGG CAG TGA CAG<br>3': GCA GGC ATG AGG CAA ACA G       | Pde1b   | 5': GAT GCT GTG CCT TCA GAG GT<br>3': GAA CAT CCG CTC CAC GAA GA             |
| Sostdc1 | 5': ACT GGA TCG AAA CAG TCG AGT T<br>3': CCT CCG GCT CCA GTA CTT TG    | Lrtm1   | 5': GAA TGA GGG TTT GTG CTG CG<br>3': AAT CAC GGG GGA CCT TTG AC             |
| Plekha4 | 5': ACT GCT GAG AAC TAA GGC CC<br>3': CGC ATG CTT GGT TTC TAC GC       | Podh20  | 5': CCT GCC GCA TGT TTT TCT GC<br>3': TAC AGA AGC TCG GTA GCA CG             |
| Spon2   | 5': ATC GCC AAA GTG ACC TTC GT<br>3': GCG GTG TCT CTG GAA CTG AA       | Mbp     | 5': GGT CCA GGC TTC CTT TGT TTT CTT C<br>3': TGT CCA GCG TGT TCT CCT AAG TCC |
| Ccl11   | 5': AGA GCT CCA CAG CGC TTC TA<br>3': GGA AGT TGG GAT GGA GCC TGG      | Tmem158 | 5': GAG GCA CAA ATG AGG TGG GA<br>3': GGA AAG AGC CGG TTT CCC TT             |
| Egr3    | 5': CTC GGT AGC CCA TTA CAA TCA G<br>3': ATC GCC GCA GTT GGA ATA AG    | Stc2    | 5': TGC CCA GGG AAA GTC ATT CA<br>3': AGC ATT CCC TCT GCA ACT GG             |
| Il11    | 5': CGC TGG GAC ATT GGG ATC TT<br>3': AGG CGA GAC ATC AAG AGC TG       | Klhl30  | 5': GCG CTA TGA TCC CTA CAC GG<br>3': GAC ACT CCA CGC ATC TGT CA             |
| Egfl8   | 5': TCA GGG ACC TCC GAA ATT GTG<br>3': CCT CAC TCT GAG GGC TTC TTC     | Ppp1r1a | 5': GAA GAC CGG ATC CCC AAC TC<br>3': CGT CTG GAG CTC TTT CAT GGT            |
| Sorcs1  | 5': TGA GAT GTG AAG AGC GGG ATT<br>3': CTG CCC TGT GCT TTG CAT AC      | Atp1b1  | 5': CGG TGA CTT TCC CTC CTT GTC<br>3': AAG CTG TAG CTG CAC CAC TCT           |
| Gzmd    | 5': ATG TGG TGA AGC CAC ACT CC<br>3': GGA CAG AGC TGT TTT TGC AGT      | Rcan2   | 5': GTT GGC TGG AAG CCT ATC<br>3': CTC TCC TGG TCC TAG TTT GG                |
| Rassf4  | 5': GGC ACA ATT CTA GTG CAC GC<br>3': CCA GAG GTC ACC GTT CAG TC       | Rgs8    | 5': TGT CAC TCA GGG TTT CAC CG<br>3': GGT TAA GGA GCT CTG CCT GG             |
| Prss35  | 5': CTG GGA CGG GAG GAT ACA GT<br>3': GGG GCT GGC AAG ATG GAT AG       | Nme7    | 5': CAC GGC CCT GAT ACT TTT GC<br>3': CCC AAC ATT CCT TCA CTG ATA GC         |
| Fgf7    | 5': GAG AGG CTC AAG TTG CAC GA<br>3': CGG TTG CTC CTT GAC TTT TGT      | Mgp     | 5': GCA ACC CTG TGC TAC GAA TC<br>3': GTA GTC ATC GCA GGC CTC TC             |
| Tgfbr3  | 5': AGC TGC CAA AGT GTG TGA CT<br>3': CAG GGG CTT GGT GAA TGT CT       | Wnt16   | 5': CTA TGA GCT GAG TAG CGG CAC<br>3': CAT TCG GTC ATG TTG CCT GC            |
| Kcnn4   | 5': GAA GAG AAT CGA CGG TCT G<br>3': TCG GTC CTT GGG TAC TTA G         | Klk4    | 5': GAA TTC GGA GCC CAG AAG CA<br>3': GGA GGC TCC TGT GAC CTC AA             |
| Prss12  | 5': TGA CAG CGA TGG ACA TAG GC<br>3': TGG CAG GAC CCT TAT AGC CA       | Olig1   | 5': GCT CCC CAA CAG TGT CTA CC<br>3': ATG GTT TGG CTG GAG AGA GC             |
| Thbd    | 5': TAG GGC CCT GGA TCG GTT TA<br>3': CTG GTG TGG TTA TCG CCA GT       | Pdgfb   | 5': TCC GTA GAT GAA GAT GGG GC<br>3': AGC TTT CCA ACT CGA CTC CG             |
| Slc24a3 | 5': GGA TCG CAG CCT TCT CCT AC<br>3': GCC ATA TCC CCC ATC CCT TG       | Acan    | 5': GCC AGG GGG AGT TGT ATT CC<br>3': TCA CAC TGC TCA TAG CCT GC             |
| Mpz     | 5': CCT CTC AGG TCA CGC TCT ATG<br>3': GCC CGC TAA CCG CTA TTT C       | Fhl1    | 5': GGG CTG TCA TCA AAG TAG<br>3': GCA ATT CTG GAG GGA AAG                   |
| Npy5r   | 5': AGG GCA TCC CGA GGA CTC TA<br>3': TGG AAA GGC AGT GTT CCG AG       | Cspg4   | 5': TGC TCT ACC GGG TGG TAA GAG G<br>3': GAA GGG CTC AGA GGA CAT CTC G       |
| Ednrb   | 5': GCG CAA TGG TCC CAA TAT C<br>3': TCT GCG AGC AAC TTG TAG G         | Cav1    | 5': CAA CAA CCT CAA CTG CCT ACT C<br>3': CCC TAA ACA AAT GGC CGT AAC C       |
| Dcn     | 5': TCC CTT ATG ACC CTG ACA ATC C<br>3': GTC CAA ACC CAG ATC AGA ACA C |         |                                                                              |

**Supplementary Table 2: Differentially expressed genes due to forskolin treatment.** A list with differentially expressed genes in treated Schwann cells (20µM forskolin) was compiled with an FDR-adjusted p-value < 0.05. The 25 transcripts with the highest positive or negative fold changes were highlighted in red.

| Differentially expressed transcripts due to forskolin |                 |                          |                           | Differentially expressed transcripts due to forskolin |                 |                          |                           |
|-------------------------------------------------------|-----------------|--------------------------|---------------------------|-------------------------------------------------------|-----------------|--------------------------|---------------------------|
| Entrez ID                                             | p-value         | Mean Ratio<br>(20 vs. 0) | Fold Change<br>(20 vs. 0) | Entrez ID                                             | p-value         | Mean Ratio<br>(20 vs. 0) | Fold Change<br>(20 vs. 0) |
| 1190002N15Rik                                         | 0.000058        | 0.64                     | -1.56                     | Aoc3                                                  | 0.004084        | 1.65                     | 1.65                      |
| 1200002N14Rik                                         | 0.000123        | 1.81                     | 1.81                      | Apbb2                                                 | 0.000860        | 0.58                     | -1.74                     |
| 1200009O22Rik                                         | 0.000792        | 1.51                     | 1.51                      | App12                                                 | 0.000006        | 1.83                     | 1.83                      |
| 1700007G11Rik                                         | 0.001151        | 0.62                     | -1.61                     | Atf3                                                  | 0.000309        | 0.30                     | -3.32                     |
| 1700021K19Rik                                         | 0.000002        | 0.38                     | -2.64                     | Atp1a2                                                | 0.000001        | 0.65                     | -1.53                     |
| 1700024G10Rik                                         | 0.000123        | 0.57                     | -1.75                     | <b>Atp1b1</b>                                         | <b>0.000028</b> | <b>0.20</b>              | <b>-4.97</b>              |
| 1700025G04Rik                                         | 0.000250        | 0.66                     | -1.52                     | Axud1                                                 | 0.000509        | 0.63                     | -1.59                     |
| 1700029G01Rik                                         | 0.000010        | 1.62                     | 1.62                      | Baalc                                                 | 0.000001        | 2.94                     | 2.94                      |
| 1810011O10Rik                                         | 0.000007        | 1.71                     | 1.71                      | Baalc                                                 | 0.000000        | 2.67                     | 2.67                      |
| 2010004A03Rik                                         | 0.000020        | 0.55                     | -1.82                     | BC020002                                              | 0.000003        | 0.58                     | -1.74                     |
| 2210410E06Rik                                         | 0.000001        | 0.58                     | -1.72                     | BC020108                                              | 0.000497        | 1.92                     | 1.92                      |
| 2310022B05Rik                                         | 0.000000        | 0.48                     | -2.07                     | BC050210                                              | 0.000374        | 0.66                     | -1.51                     |
| 2310022M17Rik                                         | 0.000140        | 0.60                     | -1.66                     | Bcl2l1                                                | 0.000002        | 2.04                     | 2.04                      |
| 2310043L02Rik                                         | 0.000356        | 0.56                     | -1.79                     | Bcl3                                                  | 0.002488        | 1.65                     | 1.65                      |
| 2310043N10Rik                                         | 0.000304        | 1.67                     | 1.67                      | Bcl7a                                                 | 0.000049        | 1.58                     | 1.58                      |
| 2410004L22Rik                                         | 0.000876        | 0.60                     | -1.67                     | Bmf                                                   | 0.000011        | 2.66                     | 2.66                      |
| 2610524A10Rik                                         | 0.000000        | 0.55                     | -1.82                     | Bmp4                                                  | 0.002119        | 1.54                     | 1.54                      |
| 2700094K13Rik                                         | 0.000059        | 0.63                     | -1.59                     | Bok                                                   | 0.000087        | 0.61                     | -1.64                     |
| 2810428I15Rik                                         | 0.000113        | 0.60                     | -1.68                     | Btbd11                                                | 0.000002        | 0.64                     | -1.57                     |
| 2810439F02Rik                                         | 0.000018        | 1.79                     | 1.79                      | C1qtnf1                                               | 0.000020        | 1.65                     | 1.65                      |
| 2810439F02Rik                                         | 0.000164        | 2.17                     | 2.17                      | C1qtnf3                                               | 0.000535        | 0.58                     | -1.73                     |
| 3300005D01Rik                                         | 0.000069        | 0.42                     | -2.39                     | C1qtnf3                                               | 0.000110        | 0.62                     | -1.60                     |
| 4632401N01Rik                                         | 0.000001        | 2.01                     | 2.01                      | Cacna1h                                               | 0.000931        | 1.69                     | 1.69                      |
| 4732458O05Rik                                         | 0.000590        | 0.65                     | -1.55                     | Calb2                                                 | 0.000450        | 0.42                     | -2.39                     |
| 4732460K03Rik                                         | 0.000034        | 0.43                     | -2.34                     | Camk2n1                                               | 0.000029        | 2.10                     | 2.10                      |
| 4833412C05Rik                                         | 0.000000        | 0.55                     | -1.83                     | Camk2n1                                               | 0.000005        | 2.11                     | 2.11                      |
| 4833431D13Rik                                         | 0.002122        | 1.59                     | 1.59                      | Capn5                                                 | 0.000282        | 1.69                     | 1.69                      |
| 4932416A11Rik                                         | 0.000002        | 1.94                     | 1.94                      | <b>Cav1</b>                                           | <b>0.000000</b> | <b>0.29</b>              | <b>-3.49</b>              |
| 4933421H10Rik                                         | 0.001195        | 1.62                     | 1.62                      | Ccdc80                                                | 0.000057        | 0.63                     | -1.58                     |
| 5430406J06Rik                                         | 0.000006        | 1.68                     | 1.68                      | <b>Ccl11</b>                                          | <b>0.000186</b> | <b>6.20</b>              | <b>6.20</b>               |
| 5430435G22Rik                                         | 0.000031        | 0.48                     | -2.07                     | <b>Ccl11</b>                                          | <b>0.000004</b> | <b>10.68</b>             | <b>10.68</b>              |
| 5430435G22Rik                                         | 0.000001        | 0.53                     | -1.90                     | Ccl7                                                  | 0.003240        | 2.16                     | 2.16                      |
| 5530400B01Rik                                         | 0.001020        | 1.53                     | 1.53                      | Ccl7                                                  | 0.000333        | 1.92                     | 1.92                      |
| 5730409K12Rik                                         | 0.000002        | 0.66                     | -1.50                     | Ccrn4l                                                | 0.000008        | 0.58                     | -1.73                     |
| 5730478M09Rik                                         | 0.000008        | 0.61                     | -1.63                     | Cd109                                                 | 0.000001        | 0.42                     | -2.37                     |
| 6330403K07Rik                                         | 0.000004        | 2.67                     | 2.67                      | Cd109                                                 | 0.000000        | 0.32                     | -3.14                     |
| 6330403M23Rik                                         | 0.000059        | 1.58                     | 1.58                      | Cd200                                                 | 0.000000        | 0.51                     | -1.97                     |
| 9430064K01Rik                                         | 0.000273        | 1.60                     | 1.60                      | Cd200                                                 | 0.000032        | 0.62                     | -1.61                     |
| 9530064J02                                            | 0.000098        | 0.66                     | -1.52                     | Cd80                                                  | 0.001090        | 0.60                     | -1.67                     |
| 9930031P18Rik                                         | 0.000422        | 1.99                     | 1.99                      | Cda                                                   | 0.003023        | 1.51                     | 1.51                      |
| A130010C12Rik                                         | 0.000124        | 1.51                     | 1.51                      | Cdca3                                                 | 0.003955        | 0.65                     | -1.53                     |
| A130082M07Rik                                         | 0.000031        | 0.62                     | -1.62                     | Cdh10                                                 | 0.000047        | 0.56                     | -1.80                     |
| A430103B12Rik                                         | 0.000309        | 1.60                     | 1.60                      | Cdh19                                                 | 0.002132        | 0.62                     | -1.62                     |
| A530088H08Rik                                         | 0.000022        | 0.53                     | -1.90                     | Cdh19                                                 | 0.000342        | 0.59                     | -1.69                     |
| A730085F06Rik                                         | 0.000008        | 1.59                     | 1.59                      | Cdh5                                                  | 0.003800        | 1.50                     | 1.50                      |
| Aadacl1                                               | 0.000185        | 1.59                     | 1.59                      | Cdk5rap2                                              | 0.000423        | 0.63                     | -1.58                     |
| Aat1                                                  | 0.000216        | 1.65                     | 1.65                      | Cdkn1a                                                | 0.001536        | 0.59                     | -1.71                     |
| Abcb4                                                 | 0.000045        | 0.46                     | -2.17                     | Cdkn1c                                                | 0.003230        | 1.80                     | 1.80                      |
| Abcc4                                                 | 0.000040        | 2.01                     | 2.01                      | Ceacam2                                               | 0.001093        | 1.58                     | 1.58                      |
| Abr                                                   | 0.000084        | 1.83                     | 1.83                      | Cebpb                                                 | 0.000479        | 2.04                     | 2.04                      |
| Acaa2                                                 | 0.003101        | 0.64                     | -1.55                     | Ch25h                                                 | 0.000010        | 0.54                     | -1.87                     |
| <b>Acan</b>                                           | <b>0.000000</b> | <b>0.27</b>              | <b>-3.72</b>              | Chst2                                                 | 0.002840        | 0.65                     | -1.53                     |
| Acan                                                  | 0.000000        | 0.41                     | -2.43                     | Ckb                                                   | 0.000006        | 0.65                     | -1.55                     |
| Acot1                                                 | 0.000001        | 1.99                     | 1.99                      | Clasp1                                                | 0.000006        | 1.53                     | 1.53                      |
| Acta2                                                 | 0.000053        | 0.64                     | -1.57                     | Clca4                                                 | 0.001403        | 1.50                     | 1.50                      |
| Acta2                                                 | 0.000068        | 0.65                     | -1.55                     | Clcf1                                                 | 0.000005        | 1.69                     | 1.69                      |
| Acta2                                                 | 0.000005        | 0.60                     | -1.65                     | Clcf1                                                 | 0.000107        | 1.54                     | 1.54                      |
| Actg2                                                 | 0.000016        | 0.61                     | -1.64                     | Clcf1                                                 | 0.000077        | 1.58                     | 1.58                      |
| Acvr1                                                 | 0.000391        | 0.66                     | -1.51                     | Clmn                                                  | 0.000030        | 1.62                     | 1.62                      |
| Adams1                                                | 0.000306        | 0.61                     | -1.63                     | Cnksr2                                                | 0.000001        | 0.51                     | -1.96                     |
| Adams12                                               | 0.000001        | 0.52                     | -1.93                     | Cnn2                                                  | 0.003388        | 0.67                     | -1.50                     |
| Adams15                                               | 0.000116        | 1.56                     | 1.56                      | Col14a1                                               | 0.000005        | 2.73                     | 2.73                      |
| Adams15                                               | 0.000251        | 0.61                     | -1.65                     | Col14a1                                               | 0.000000        | 2.63                     | 2.63                      |
| Add3                                                  | 0.000000        | 2.24                     | 2.24                      | Col15a1                                               | 0.000009        | 0.48                     | -2.10                     |
| Add3                                                  | 0.000000        | 2.00                     | 2.00                      | Col28a1                                               | 0.000051        | 0.58                     | -1.72                     |
| Aebp1                                                 | 0.000212        | 1.51                     | 1.51                      | Col4a5                                                | 0.000017        | 0.63                     | -1.60                     |
| Agrn                                                  | 0.000056        | 0.60                     | -1.66                     | Col5a2                                                | 0.003559        | 0.66                     | -1.51                     |
| Alcam                                                 | 0.000004        | 2.07                     | 2.07                      | Col8a1                                                | 0.001428        | 0.63                     | -1.59                     |
| Aldh1a3                                               | 0.000514        | 0.53                     | -1.89                     | Coro2b                                                | 0.000026        | 1.77                     | 1.77                      |
| Aldh1a3                                               | 0.000066        | 0.37                     | -2.71                     | Cpne8                                                 | 0.001910        | 0.61                     | -1.64                     |
| Ankrd39                                               | 0.000578        | 0.64                     | -1.57                     | Crabp2                                                | 0.000175        | 2.09                     | 2.09                      |
| Anp32e                                                | 0.000013        | 0.63                     | -1.59                     | Creb5                                                 | 0.000039        | 0.52                     | -1.92                     |
| Anxa1                                                 | 0.000020        | 0.55                     | -1.81                     | Crhbp                                                 | 0.000006        | 1.83                     | 1.83                      |

Supplementary Table 2: continued

| Differentially expressed transcripts due to forskolin |          |                          | Differentially expressed transcripts due to forskolin |           |          |                          |                           |
|-------------------------------------------------------|----------|--------------------------|-------------------------------------------------------|-----------|----------|--------------------------|---------------------------|
| Entrez ID                                             | p-value  | Mean Ratio<br>(20 vs. 0) | Fold Change<br>(20 vs. 0)                             | Entrez ID | p-value  | Mean Ratio<br>(20 vs. 0) | Fold Change<br>(20 vs. 0) |
| Crispld2                                              | 0.000948 | 1.61                     | 1.61                                                  | Fgf7      | 0.000437 | 3.78                     | 3.78                      |
| Crif1                                                 | 0.000001 | 1.53                     | 1.53                                                  | Fgfr1     | 0.000243 | 1.97                     | 1.97                      |
| Cryab                                                 | 0.000033 | 0.55                     | -1.83                                                 | Fhl1      | 0.000000 | 0.27                     | -3.64                     |
| Csmd2                                                 | 0.000700 | 1.63                     | 1.63                                                  | Fhl1      | 0.000000 | 0.32                     | -3.13                     |
| Cspg4                                                 | 0.000000 | 0.28                     | -3.52                                                 | Fjx1      | 0.000168 | 1.97                     | 1.97                      |
| Csrp3                                                 | 0.000332 | 0.64                     | -1.56                                                 | Fjx1      | 0.000243 | 1.65                     | 1.65                      |
| Cthrc1                                                | 0.000000 | 2.39                     | 2.39                                                  | Fkh18     | 0.000072 | 0.54                     | -1.86                     |
| Ctsb                                                  | 0.002984 | 1.53                     | 1.53                                                  | Flt1      | 0.000003 | 0.52                     | -1.94                     |
| Cx3cl1                                                | 0.003110 | 1.76                     | 1.76                                                  | Fmn2      | 0.000246 | 1.57                     | 1.57                      |
| Cxcl1                                                 | 0.002912 | 2.01                     | 2.01                                                  | Fmn3      | 0.000000 | 0.59                     | -1.70                     |
| Cxcl12                                                | 0.003575 | 1.91                     | 1.91                                                  | Fmn3      | 0.000001 | 0.56                     | -1.80                     |
| Cxcl12                                                | 0.001442 | 1.81                     | 1.81                                                  | Fmod      | 0.001786 | 2.03                     | 2.03                      |
| Cxcl14                                                | 0.000115 | 2.57                     | 2.57                                                  | Foxi2     | 0.000000 | 1.88                     | 1.88                      |
| Cxcl14                                                | 0.000860 | 1.72                     | 1.72                                                  | Foxo1     | 0.001664 | 0.55                     | -1.81                     |
| Cyp2d22                                               | 0.000081 | 1.66                     | 1.66                                                  | Frdm4a    | 0.000512 | 1.63                     | 1.63                      |
| D030063E12                                            | 0.000000 | 1.86                     | 1.86                                                  | Fxyd3     | 0.001011 | 2.34                     | 2.34                      |
| D030072B18Rik                                         | 0.000001 | 0.66                     | -1.51                                                 | Fxyd5     | 0.000003 | 0.61                     | -1.65                     |
| DOH4S114                                              | 0.000004 | 1.66                     | 1.66                                                  | Fxyd5     | 0.000181 | 0.64                     | -1.56                     |
| D12Ertid553e                                          | 0.000619 | 1.68                     | 1.68                                                  | Fxyd5     | 0.000149 | 0.64                     | -1.57                     |
| D16Ertid472e                                          | 0.000045 | 1.55                     | 1.55                                                  | Fyb       | 0.000083 | 0.56                     | -1.78                     |
| D1Ertid471e                                           | 0.002910 | 0.60                     | -1.67                                                 | Fzd2      | 0.000048 | 1.52                     | 1.52                      |
| D330020A13Rik                                         | 0.000001 | 1.85                     | 1.85                                                  | Fzd6      | 0.000004 | 1.80                     | 1.80                      |
| D330027H18Rik                                         | 0.000000 | 0.60                     | -1.66                                                 | Fzd6      | 0.000000 | 2.17                     | 2.17                      |
| D630040I23Rik                                         | 0.000030 | 0.60                     | -1.67                                                 | Gab1      | 0.000001 | 0.42                     | -2.41                     |
| Dap                                                   | 0.000018 | 0.66                     | -1.51                                                 | Gabbr3    | 0.000018 | 0.53                     | -1.89                     |
| Dbndd2                                                | 0.000000 | 0.48                     | -2.06                                                 | Gabbr3    | 0.000046 | 0.59                     | -1.70                     |
| Dclk1                                                 | 0.000575 | 1.73                     | 1.73                                                  | Gadd45b   | 0.000003 | 0.54                     | -1.87                     |
| Dcn                                                   | 0.002973 | 2.90                     | 2.90                                                  | Galnt2    | 0.000000 | 1.61                     | 1.61                      |
| Dcn                                                   | 0.000668 | 3.16                     | 3.16                                                  | Galnt2    | 0.000003 | 1.74                     | 1.74                      |
| Ddit4                                                 | 0.000000 | 2.27                     | 2.27                                                  | Galnt2    | 0.000020 | 1.84                     | 1.84                      |
| Ddit4l                                                | 0.003681 | 1.50                     | 1.50                                                  | Galnt4    | 0.001064 | 0.53                     | -1.88                     |
| Depdc6                                                | 0.000878 | 1.59                     | 1.59                                                  | Gap43     | 0.000036 | 0.50                     | -2.00                     |
| Des                                                   | 0.000003 | 0.50                     | -1.99                                                 | Gas2l3    | 0.000054 | 1.68                     | 1.68                      |
| Dhh                                                   | 0.000000 | 1.80                     | 1.80                                                  | Gas2l3    | 0.001408 | 1.59                     | 1.59                      |
| Dhx32                                                 | 0.000032 | 0.57                     | -1.75                                                 | Gdf1      | 0.000021 | 1.73                     | 1.73                      |
| Diras1                                                | 0.000001 | 0.41                     | -2.47                                                 | Gdnf      | 0.002929 | 0.65                     | -1.54                     |
| Dlk1                                                  | 0.000515 | 1.69                     | 1.69                                                  | Gdpd5     | 0.000309 | 1.66                     | 1.66                      |
| Dlk1                                                  | 0.000030 | 2.10                     | 2.10                                                  | Gfap      | 0.004051 | 1.52                     | 1.52                      |
| Dm15                                                  | 0.000049 | 0.58                     | -1.73                                                 | Gja1      | 0.002280 | 1.80                     | 1.80                      |
| Dok5                                                  | 0.000002 | 0.59                     | -1.70                                                 | Glis1     | 0.000486 | 1.82                     | 1.82                      |
| Dok5                                                  | 0.000147 | 0.64                     | -1.55                                                 | Gng2      | 0.001858 | 1.63                     | 1.63                      |
| Dst                                                   | 0.000612 | 1.55                     | 1.55                                                  | Gng2      | 0.000472 | 1.74                     | 1.74                      |
| Dstn                                                  | 0.000018 | 0.67                     | -1.50                                                 | Gnptab    | 0.000001 | 1.57                     | 1.57                      |
| Dtna                                                  | 0.000000 | 0.40                     | -2.51                                                 | Gp38      | 0.000927 | 1.65                     | 1.65                      |
| Dtna                                                  | 0.000082 | 0.60                     | -1.67                                                 | Gpbar1    | 0.000420 | 0.63                     | -1.58                     |
| Dusp4                                                 | 0.000370 | 0.66                     | -1.52                                                 | Gpr137b   | 0.000095 | 1.60                     | 1.60                      |
| Dusp4                                                 | 0.000914 | 0.61                     | -1.64                                                 | Gpr153    | 0.000252 | 1.52                     | 1.52                      |
| Dusp8                                                 | 0.000026 | 1.71                     | 1.71                                                  | Gpr176    | 0.000000 | 0.41                     | -2.43                     |
| Dysf                                                  | 0.000000 | 0.55                     | -1.82                                                 | Gpr23     | 0.000011 | 1.58                     | 1.58                      |
| E230013M07Rik                                         | 0.000000 | 5.49                     | 5.49                                                  | Gse1      | 0.000033 | 1.59                     | 1.59                      |
| E330035H20Rik                                         | 0.000004 | 1.71                     | 1.71                                                  | Gsn       | 0.001129 | 0.62                     | -1.61                     |
| Ednrb                                                 | 0.000001 | 3.25                     | 3.25                                                  | Gsta4     | 0.000677 | 1.67                     | 1.67                      |
| Ednrb                                                 | 0.000000 | 2.32                     | 2.32                                                  | Gstm1     | 0.000002 | 1.63                     | 1.63                      |
| Ednrb                                                 | 0.000000 | 2.05                     | 2.05                                                  | Gucy1a3   | 0.002333 | 0.61                     | -1.65                     |
| EG574403                                              | 0.002279 | 1.53                     | 1.53                                                  | Gzmd      | 0.002338 | 1.61                     | 1.61                      |
| Egfl8                                                 | 0.000068 | 6.19                     | 6.19                                                  | Gzmd      | 0.002419 | 4.95                     | 4.95                      |
| Egfl8                                                 | 0.000104 | 5.04                     | 5.04                                                  | Gzme      | 0.003553 | 3.09                     | 3.09                      |
| Egr3                                                  | 0.000001 | 7.26                     | 7.26                                                  | Gzme      | 0.003961 | 2.22                     | 2.22                      |
| Ehd4                                                  | 0.000029 | 0.62                     | -1.60                                                 | Hdac4     | 0.002296 | 1.54                     | 1.54                      |
| Emb                                                   | 0.002300 | 2.50                     | 2.50                                                  | Hdac5     | 0.000754 | 0.65                     | -1.53                     |
| En1                                                   | 0.000490 | 0.52                     | -1.93                                                 | Hdac5     | 0.000002 | 0.60                     | -1.67                     |
| Enc1                                                  | 0.000343 | 0.35                     | -2.88                                                 | Hebp1     | 0.000440 | 0.63                     | -1.59                     |
| Endod1                                                | 0.000006 | 0.48                     | -2.09                                                 | Heyl      | 0.000240 | 0.57                     | -1.74                     |
| Entpd2                                                | 0.004328 | 1.92                     | 1.92                                                  | Hist1h2af | 0.000275 | 0.66                     | -1.52                     |
| Epb4.114b                                             | 0.000001 | 2.62                     | 2.62                                                  | Hist1h2ah | 0.004376 | 0.63                     | -1.60                     |
| Epb4.114b                                             | 0.000001 | 2.66                     | 2.66                                                  | Hmga1     | 0.000010 | 0.53                     | -1.89                     |
| Errfi1                                                | 0.000249 | 2.87                     | 2.87                                                  | Hs2st1    | 0.000000 | 0.66                     | -1.51                     |
| Ets1                                                  | 0.000000 | 0.58                     | -1.72                                                 | Hs3st3a1  | 0.000307 | 0.55                     | -1.80                     |
| Fabp3                                                 | 0.000109 | 0.57                     | -1.75                                                 | Hsd11b1   | 0.000535 | 1.60                     | 1.60                      |
| Fam132b                                               | 0.000808 | 0.62                     | -1.61                                                 | Hsd17b11  | 0.000239 | 1.59                     | 1.59                      |
| Fam134b                                               | 0.000030 | 2.04                     | 2.04                                                  | Hspa11    | 0.000110 | 0.61                     | -1.65                     |
| Fam171b                                               | 0.002227 | 0.42                     | -2.40                                                 | Hspb1     | 0.000062 | 0.38                     | -2.66                     |
| Farp2                                                 | 0.000002 | 1.85                     | 1.85                                                  | Hspb2     | 0.000037 | 0.53                     | -1.88                     |
|                                                       |          |                          |                                                       | Hspb3     | 0.000005 | 0.50                     | -2.00                     |
|                                                       |          |                          |                                                       | Htra3     | 0.000998 | 0.63                     | -1.59                     |

Supplementary Table 2: continued

| Differentially expressed transcripts due to forskolin |          |                          |                           | Differentially expressed transcripts due to forskolin |          |                          |                           |
|-------------------------------------------------------|----------|--------------------------|---------------------------|-------------------------------------------------------|----------|--------------------------|---------------------------|
| Entrez ID                                             | p-value  | Mean Ratio<br>(20 vs. 0) | Fold Change<br>(20 vs. 0) | Entrez ID                                             | p-value  | Mean Ratio<br>(20 vs. 0) | Fold Change<br>(20 vs. 0) |
| ld1                                                   | 0.002180 | 1.50                     | 1.50                      | LOC100045228                                          | 0.000279 | 2.20                     | 2.20                      |
| ld2                                                   | 0.000000 | 2.12                     | 2.12                      | LOC100047214                                          | 0.000075 | 1.63                     | 1.63                      |
| ldb2                                                  | 0.000000 | 3.03                     | 3.03                      | LOC100047268                                          | 0.000292 | 2.02                     | 2.02                      |
| lfit2                                                 | 0.002078 | 0.66                     | -1.51                     | LOC100047583                                          | 0.000444 | 0.35                     | -2.82                     |
| lgf1                                                  | 0.000049 | 0.63                     | -1.60                     | LOC100047606                                          | 0.000006 | 1.82                     | 1.82                      |
| lgf1                                                  | 0.000001 | 0.53                     | -1.89                     | LOC100047619                                          | 0.000125 | 0.63                     | -1.58                     |
| lgfbp3                                                | 0.000001 | 0.40                     | -2.47                     | LOC100047659                                          | 0.000003 | 3.07                     | 3.07                      |
| lgfbp3                                                | 0.000227 | 0.50                     | -2.02                     | LOC100047808                                          | 0.000013 | 0.41                     | -2.47                     |
| lgfbp5                                                | 0.000000 | 1.85                     | 1.85                      | LOC100048721                                          | 0.000468 | 1.52                     | 1.52                      |
| lgfbp5                                                | 0.000001 | 2.09                     | 2.09                      | LOC218877                                             | 0.000013 | 1.72                     | 1.72                      |
| lgfbp5                                                | 0.000000 | 2.14                     | 2.14                      | LOC234081                                             | 0.000026 | 0.53                     | -1.88                     |
| lgsf11                                                | 0.000003 | 2.77                     | 2.77                      | LOC240672                                             | 0.000010 | 0.40                     | -2.50                     |
| lgsf11                                                | 0.000007 | 2.77                     | 2.77                      | LOC638935                                             | 0.000007 | 0.52                     | -1.92                     |
| lgsf4a                                                | 0.000000 | 0.46                     | -2.16                     | LOC666036                                             | 0.000000 | 0.54                     | -1.85                     |
| lkbkg                                                 | 0.000001 | 1.63                     | 1.63                      | Loxl4                                                 | 0.000133 | 0.55                     | -1.82                     |
| Il11                                                  | 0.000000 | 7.24                     | 7.24                      | Lpcat2                                                | 0.001179 | 0.58                     | -1.74                     |
| Il33                                                  | 0.003905 | 1.75                     | 1.75                      | Lrrc17                                                | 0.002276 | 1.71                     | 1.71                      |
| Il6                                                   | 0.002469 | 1.51                     | 1.51                      | Lrrn3                                                 | 0.000000 | 0.42                     | -2.39                     |
| Inpp5a                                                | 0.000009 | 0.55                     | -1.83                     | Lrrtm2                                                | 0.000941 | 1.92                     | 1.92                      |
| Inpp5a                                                | 0.000004 | 0.53                     | -1.89                     | Lrtm1                                                 | 0.000010 | 0.09                     | -11.60                    |
| Inpp5f                                                | 0.002289 | 1.59                     | 1.59                      | Lrtm1                                                 | 0.000018 | 0.09                     | -10.92                    |
| Inpp1                                                 | 0.000558 | 0.65                     | -1.54                     | Lum                                                   | 0.001457 | 1.98                     | 1.98                      |
| lqgap2                                                | 0.000585 | 2.17                     | 2.17                      | Lypd1                                                 | 0.000378 | 0.64                     | -1.57                     |
| lrf6                                                  | 0.000001 | 0.38                     | -2.61                     | Mapk9                                                 | 0.000262 | 0.65                     | -1.53                     |
| lrgm1                                                 | 0.004311 | 0.66                     | -1.51                     | Matn2                                                 | 0.000001 | 1.62                     | 1.62                      |
| ltga1                                                 | 0.000000 | 0.49                     | -2.05                     | Mbp                                                   | 0.000000 | 0.10                     | -9.98                     |
| ltga5                                                 | 0.000262 | 0.64                     | -1.56                     | Mbp                                                   | 0.000016 | 0.40                     | -2.51                     |
| ltgb4                                                 | 0.000036 | 1.63                     | 1.63                      | Mcf2l                                                 | 0.000045 | 0.55                     | -1.81                     |
| ltgb4                                                 | 0.000177 | 1.68                     | 1.68                      | Mdga2                                                 | 0.000225 | 0.65                     | -1.53                     |
| ltgb5                                                 | 0.000096 | 0.54                     | -1.86                     | Mdh1                                                  | 0.000175 | 0.59                     | -1.70                     |
| ltgb8                                                 | 0.000002 | 1.59                     | 1.59                      | Me2                                                   | 0.000729 | 0.66                     | -1.51                     |
| ltpk1                                                 | 0.001470 | 0.63                     | -1.59                     | Mef2c                                                 | 0.000068 | 0.46                     | -2.19                     |
| lvi                                                   | 0.000291 | 0.56                     | -1.79                     | Mef2c                                                 | 0.000000 | 0.33                     | -3.03                     |
| Jun                                                   | 0.000020 | 0.62                     | -1.61                     | Mef2c                                                 | 0.000000 | 0.36                     | -2.81                     |
| Kcna6                                                 | 0.000028 | 1.60                     | 1.60                      | Meox1                                                 | 0.000124 | 0.67                     | -1.50                     |
| Kcna6                                                 | 0.000011 | 1.62                     | 1.62                      | Mertk                                                 | 0.002382 | 1.64                     | 1.64                      |
| Kcnab1                                                | 0.000363 | 0.65                     | -1.54                     | Mfap2                                                 | 0.000007 | 1.55                     | 1.55                      |
| Kcnab1                                                | 0.003562 | 0.67                     | -1.50                     | Mfap2                                                 | 0.000203 | 1.69                     | 1.69                      |
| Kcnh2                                                 | 0.000017 | 2.08                     | 2.08                      | Mgll                                                  | 0.000063 | 0.57                     | -1.76                     |
| Kcnh2                                                 | 0.000028 | 1.77                     | 1.77                      | Mgll                                                  | 0.000002 | 0.46                     | -2.18                     |
| Kcnj12                                                | 0.000169 | 0.64                     | -1.55                     | Mgll                                                  | 0.000180 | 0.53                     | -1.88                     |
| Kcnk13                                                | 0.000001 | 0.40                     | -2.49                     | Mgp                                                   | 0.000448 | 0.25                     | -4.01                     |
| Kcnk5                                                 | 0.000000 | 2.08                     | 2.08                      | Mgst1                                                 | 0.000900 | 1.88                     | 1.88                      |
| Kcnk5                                                 | 0.000000 | 2.12                     | 2.12                      | Mgst1                                                 | 0.000695 | 2.66                     | 2.66                      |
| Kcnn4                                                 | 0.000000 | 3.62                     | 3.62                      | Mid1ip1                                               | 0.000558 | 0.66                     | -1.52                     |
| Kif21a                                                | 0.000013 | 1.59                     | 1.59                      | Mid2                                                  | 0.000001 | 0.40                     | -2.49                     |
| Kif26a                                                | 0.000000 | 1.51                     | 1.51                      | Mmd2                                                  | 0.001290 | 1.50                     | 1.50                      |
| Kitl                                                  | 0.000289 | 1.76                     | 1.76                      | Mmp15                                                 | 0.000371 | 1.90                     | 1.90                      |
| Klf13                                                 | 0.000042 | 1.75                     | 1.75                      | Mmp17                                                 | 0.000003 | 0.41                     | -2.45                     |
| Klhl26                                                | 0.000002 | 1.70                     | 1.70                      | Moxd1                                                 | 0.000020 | 0.58                     | -1.73                     |
| Klh30                                                 | 0.000000 | 0.14                     | -7.04                     | Moxd1                                                 | 0.000012 | 0.59                     | -1.70                     |
| Klk4                                                  | 0.000008 | 0.25                     | -3.95                     | Mpz                                                   | 0.000072 | 3.41                     | 3.41                      |
| Klk8                                                  | 0.000001 | 0.33                     | -3.04                     | Myl9                                                  | 0.000527 | 0.64                     | -1.57                     |
| Krt23                                                 | 0.001666 | 0.64                     | -1.57                     | Myom1                                                 | 0.000651 | 0.66                     | -1.53                     |
| Lama1                                                 | 0.002195 | 1.75                     | 1.75                      | Ncald                                                 | 0.003406 | 1.58                     | 1.58                      |
| Lbh                                                   | 0.000000 | 0.35                     | -2.88                     | Ncam1                                                 | 0.000030 | 2.20                     | 2.20                      |
| Lbh                                                   | 0.000000 | 0.34                     | -2.98                     | Ncam1                                                 | 0.002629 | 1.52                     | 1.52                      |
| Leprel1                                               | 0.000001 | 0.52                     | -1.93                     | Ndrp1                                                 | 0.000000 | 2.21                     | 2.21                      |
| Leprel1                                               | 0.000000 | 0.34                     | -2.94                     | Ndr1                                                  | 0.000000 | 2.12                     | 2.12                      |
| Lgi4                                                  | 0.000215 | 1.87                     | 1.87                      | Nedd4l                                                | 0.000017 | 0.65                     | -1.53                     |
| Lgmn                                                  | 0.000000 | 0.52                     | -1.94                     | Nek1                                                  | 0.001319 | 1.63                     | 1.63                      |
| Lgr6                                                  | 0.000055 | 0.66                     | -1.50                     | Nid1                                                  | 0.000002 | 1.77                     | 1.77                      |
| Lhfp                                                  | 0.000068 | 1.68                     | 1.68                      | Nid1                                                  | 0.000050 | 1.88                     | 1.88                      |
| Lhfp                                                  | 0.000288 | 1.76                     | 1.76                      | Nme7                                                  | 0.000042 | 0.55                     | -1.80                     |
| Lhfp                                                  | 0.000142 | 1.52                     | 1.52                      | Nme7                                                  | 0.000002 | 0.24                     | -4.12                     |
| Lims2                                                 | 0.000000 | 0.42                     | -2.38                     | Nme7                                                  | 0.000011 | 0.29                     | -3.42                     |
| Lims2                                                 | 0.000000 | 0.45                     | -2.23                     | Nnat                                                  | 0.000008 | 2.15                     | 2.15                      |
| Lims2                                                 | 0.000000 | 0.49                     | -2.05                     | Nppb                                                  | 0.000184 | 0.54                     | -1.84                     |
| Lip1                                                  | 0.000001 | 0.53                     | -1.87                     | Npr3                                                  | 0.002365 | 2.86                     | 2.86                      |
| Lip1                                                  | 0.000084 | 0.61                     | -1.64                     | Npr3                                                  | 0.000730 | 1.59                     | 1.59                      |
| Liph                                                  | 0.000176 | 1.82                     | 1.82                      | Npr3                                                  | 0.001797 | 1.84                     | 1.84                      |
| Liph                                                  | 0.000193 | 2.34                     | 2.34                      | Npy1r                                                 | 0.000012 | 2.37                     | 2.37                      |
| LOC100044177                                          | 0.000006 | 3.09                     | 3.09                      | Npy5r                                                 | 0.000007 | 2.79                     | 2.79                      |
|                                                       |          |                          |                           | Npy5r                                                 | 0.000000 | 3.31                     | 3.31                      |
|                                                       |          |                          |                           | Nr2f2                                                 | 0.000111 | 1.66                     | 1.66                      |

Supplementary Table 2: continued

| Differentially expressed transcripts due to forskolin |                 |                          |                           | Differentially expressed transcripts due to forskolin |                 |                          |                           |
|-------------------------------------------------------|-----------------|--------------------------|---------------------------|-------------------------------------------------------|-----------------|--------------------------|---------------------------|
| Entrez ID                                             | p-value         | Mean Ratio<br>(20 vs. 0) | Fold Change<br>(20 vs. 0) | Entrez ID                                             | p-value         | Mean Ratio<br>(20 vs. 0) | Fold Change<br>(20 vs. 0) |
| Nrbp2                                                 | 0.000756        | 1.68                     | 1.68                      | Ptpru                                                 | 0.000054        | 1.88                     | 1.88                      |
| Nupr1                                                 | 0.000923        | 0.57                     | -1.76                     | Ptprz1                                                | 0.000096        | 0.30                     | -3.32                     |
| Olfml3                                                | 0.000735        | 1.86                     | 1.86                      | Ramp3                                                 | 0.000009        | 2.31                     | 2.31                      |
| <b>Olig1</b>                                          | <b>0.000857</b> | <b>0.25</b>              | <b>-3.94</b>              | Rap2a                                                 | 0.000000        | 2.33                     | 2.33                      |
| Osbpl3                                                | 0.000140        | 1.50                     | 1.50                      | Rasl12                                                | 0.000656        | 0.60                     | -1.66                     |
| OTTMUSG00000002196                                    | 0.000113        | 0.43                     | -2.31                     | Rassf4                                                | 0.002989        | 1.54                     | 1.54                      |
| P2rx5                                                 | 0.000000        | 0.36                     | -2.80                     | <b>Rassf4</b>                                         | <b>0.004456</b> | <b>4.34</b>              | <b>4.34</b>               |
| P2ry1                                                 | 0.000036        | 0.60                     | -1.67                     | Rbms3                                                 | 0.000031        | 1.81                     | 1.81                      |
| Pacsin2                                               | 0.000118        | 0.66                     | -1.52                     | Rbmx                                                  | 0.000060        | 0.65                     | -1.54                     |
| Padi2                                                 | 0.000025        | 0.62                     | -1.62                     | Rbpm52                                                | 0.000045        | 0.66                     | -1.52                     |
| Parp14                                                | 0.000000        | 2.04                     | 2.04                      | <b>Rcan2</b>                                          | <b>0.000008</b> | <b>0.21</b>              | <b>-4.87</b>              |
| Pbk                                                   | 0.001506        | 0.58                     | -1.73                     | Rcan2                                                 | 0.000000        | 0.35                     | -2.85                     |
| Pcdh17                                                | 0.001548        | 0.54                     | -1.87                     | Rcsd1                                                 | 0.001466        | 0.66                     | -1.52                     |
| <b>Pcdh20</b>                                         | <b>0.000000</b> | <b>0.07</b>              | <b>-14.02</b>             | Rdh5                                                  | 0.000477        | 1.66                     | 1.66                      |
| <b>Pcdh20</b>                                         | <b>0.000000</b> | <b>0.10</b>              | <b>-10.07</b>             | Reln                                                  | 0.000030        | 2.73                     | 2.73                      |
| Pdc4                                                  | 0.000169        | 1.53                     | 1.53                      | Rftn1                                                 | 0.000688        | 0.60                     | -1.66                     |
| Pde10a                                                | 0.000072        | 1.52                     | 1.52                      | Rgs16                                                 | 0.000001        | 0.33                     | -3.01                     |
| Pde1a                                                 | 0.002561        | 1.71                     | 1.71                      | Rgs3                                                  | 0.000000        | 0.58                     | -1.72                     |
| Pde1a                                                 | 0.002365        | 2.00                     | 2.00                      | <b>Rgs8</b>                                           | <b>0.000010</b> | <b>0.22</b>              | <b>-4.61</b>              |
| <b>Pde1b</b>                                          | <b>0.000000</b> | <b>0.09</b>              | <b>-11.30</b>             | Rhoc                                                  | 0.000149        | 0.67                     | -1.50                     |
| <b>Pde1b</b>                                          | <b>0.000000</b> | <b>0.08</b>              | <b>-12.05</b>             | Rin1                                                  | 0.000002        | 0.63                     | -1.60                     |
| Pde4b                                                 | 0.000000        | 2.54                     | 2.54                      | Rnf125                                                | 0.001748        | 1.68                     | 1.68                      |
| Pde4d                                                 | 0.000069        | 1.71                     | 1.71                      | Robo2                                                 | 0.000845        | 1.62                     | 1.62                      |
| Pde7b                                                 | 0.000053        | 1.84                     | 1.84                      | Rorb                                                  | 0.000038        | 1.62                     | 1.62                      |
| Pdgfa                                                 | 0.000747        | 0.64                     | -1.57                     | Rrm2                                                  | 0.000226        | 0.64                     | -1.56                     |
| <b>Pdgfb</b>                                          | <b>0.000314</b> | <b>0.26</b>              | <b>-3.84</b>              | Rxfp3                                                 | 0.000103        | 0.60                     | -1.67                     |
| Pea15                                                 | 0.000001        | 0.53                     | -1.89                     | Satb1                                                 | 0.000000        | 0.32                     | -3.16                     |
| Pea15a                                                | 0.000191        | 0.57                     | -1.74                     | Scd1                                                  | 0.000039        | 1.61                     | 1.61                      |
| Pgf                                                   | 0.000002        | 0.44                     | -2.27                     | sc1000981.1_40                                        | 0.003147        | 1.56                     | 1.56                      |
| Phgdh                                                 | 0.000025        | 0.53                     | -1.90                     | Sema3b                                                | 0.000002        | 2.00                     | 2.00                      |
| Pik3r1                                                | 0.000294        | 1.69                     | 1.69                      | Sema3b                                                | 0.000436        | 1.69                     | 1.69                      |
| Pitpnc1                                               | 0.003041        | 1.62                     | 1.62                      | Sema6b                                                | 0.002104        | 1.83                     | 1.83                      |
| Pkig                                                  | 0.000001        | 1.71                     | 1.71                      | Sema6b                                                | 0.000987        | 1.71                     | 1.71                      |
| Pla2g7                                                | 0.000083        | 1.93                     | 1.93                      | 39692                                                 | 0.000066        | 0.66                     | -1.51                     |
| Plau                                                  | 0.000221        | 2.41                     | 2.41                      | Sfrp1                                                 | 0.003690        | 1.96                     | 1.96                      |
| Pld3                                                  | 0.000022        | 1.71                     | 1.71                      | Sfrp1                                                 | 0.000487        | 1.88                     | 1.88                      |
| <b>Plekha4</b>                                        | <b>0.000000</b> | <b>4.15</b>              | <b>4.15</b>               | Sgk1                                                  | 0.002665        | 1.89                     | 1.89                      |
| <b>Plekha4</b>                                        | <b>0.000000</b> | <b>17.53</b>             | <b>17.53</b>              | Sgsm3                                                 | 0.000001        | 1.56                     | 1.56                      |
| Plekhh1                                               | 0.000000        | 1.67                     | 1.67                      | Shh                                                   | 0.000420        | 2.49                     | 2.49                      |
| Plip                                                  | 0.001800        | 0.64                     | -1.57                     | Slamf9                                                | 0.000341        | 0.61                     | -1.63                     |
| Plxna2                                                | 0.000214        | 0.58                     | -1.71                     | Slc16a11                                              | 0.000009        | 1.52                     | 1.52                      |
| Pmaip1                                                | 0.002204        | 0.65                     | -1.55                     | Slc17a8                                               | 0.000000        | 1.89                     | 1.89                      |
| Pmepa1                                                | 0.000323        | 1.62                     | 1.62                      | <b>Slc24a3</b>                                        | <b>0.000037</b> | <b>3.53</b>              | <b>3.53</b>               |
| Pmepa1                                                | 0.000526        | 1.56                     | 1.56                      | Slit2                                                 | 0.000181        | 1.80                     | 1.80                      |
| Pmp22                                                 | 0.003731        | 1.52                     | 1.52                      | Slit3                                                 | 0.000000        | 1.83                     | 1.83                      |
| Ppap2a                                                | 0.000226        | 0.47                     | -2.11                     | Smad3                                                 | 0.000166        | 1.57                     | 1.57                      |
| Ppap2a                                                | 0.000001        | 0.47                     | -2.11                     | Snta1                                                 | 0.000001        | 0.49                     | -2.03                     |
| Ppap2a                                                | 0.000000        | 0.38                     | -2.66                     | Snx10                                                 | 0.000069        | 1.57                     | 1.57                      |
| Ppap2b                                                | 0.001931        | 2.76                     | 2.76                      | Snx16                                                 | 0.000374        | 2.69                     | 2.69                      |
| Ppap2b                                                | 0.000091        | 2.81                     | 2.81                      | Snx7                                                  | 0.001131        | 0.62                     | -1.61                     |
| Pbbp                                                  | 0.001434        | 1.71                     | 1.71                      | Socs3                                                 | 0.003840        | 1.85                     | 1.85                      |
| Pbbp                                                  | 0.001813        | 1.94                     | 1.94                      | Sod3                                                  | 0.000072        | 2.31                     | 2.31                      |
| Ppm2c                                                 | 0.000696        | 0.65                     | -1.53                     | Sorcs1                                                | 0.000000        | 2.55                     | 2.55                      |
| <b>Ppp1r1a</b>                                        | <b>0.000002</b> | <b>0.17</b>              | <b>-5.83</b>              | <b>Sorcs1</b>                                         | <b>0.000000</b> | <b>5.68</b>              | <b>5.68</b>               |
| Ppp3ca                                                | 0.000000        | 2.16                     | 2.16                      | Sorcs1                                                | 0.000002        | 1.55                     | 1.55                      |
| Ppp3ca                                                | 0.000026        | 2.23                     | 2.23                      | <b>Sostdc1</b>                                        | <b>0.000002</b> | <b>35.54</b>             | <b>35.54</b>              |
| Prelp                                                 | 0.000006        | 1.66                     | 1.66                      | <b>Spon2</b>                                          | <b>0.001100</b> | <b>14.12</b>             | <b>14.12</b>              |
| Prkg1                                                 | 0.000041        | 0.34                     | -2.90                     | Spsb4                                                 | 0.000001        | 0.40                     | -2.48                     |
| Prkg1                                                 | 0.000000        | 0.40                     | -2.51                     | Srpx2                                                 | 0.002500        | 0.63                     | -1.58                     |
| Pr12c2                                                | 0.001734        | 1.57                     | 1.57                      | Ssbp2                                                 | 0.000009        | 1.52                     | 1.52                      |
| Pros1                                                 | 0.001808        | 1.64                     | 1.64                      | St3gal5                                               | 0.000085        | 0.55                     | -1.81                     |
| <b>Prss12</b>                                         | <b>0.000004</b> | <b>3.61</b>              | <b>3.61</b>               | Stc1                                                  | 0.000171        | 1.70                     | 1.70                      |
| Prss12                                                | 0.000005        | 3.16                     | 3.16                      | <b>Stc2</b>                                           | <b>0.000039</b> | <b>0.11</b>              | <b>-8.82</b>              |
| Prss23                                                | 0.000005        | 0.53                     | -1.89                     | Stmn4                                                 | 0.000256        | 0.60                     | -1.67                     |
| <b>Prss35</b>                                         | <b>0.000339</b> | <b>4.18</b>              | <b>4.18</b>               | Stmn4                                                 | 0.000060        | 0.61                     | -1.65                     |
| Psm8                                                  | 0.000000        | 0.61                     | -1.64                     | Sv2b                                                  | 0.001656        | 0.55                     | -1.82                     |
| Ptgis                                                 | 0.001424        | 0.66                     | -1.51                     | Svep1                                                 | 0.001823        | 2.53                     | 2.53                      |
| Ptk2                                                  | 0.000012        | 0.64                     | -1.56                     | Syn1                                                  | 0.000052        | 1.71                     | 1.71                      |
| Ptn                                                   | 0.000005        | 2.82                     | 2.82                      | Syn1                                                  | 0.001779        | 1.58                     | 1.58                      |
| Ptpla                                                 | 0.000513        | 0.64                     | -1.55                     | Synpo                                                 | 0.000129        | 1.53                     | 1.53                      |
| Ptprn                                                 | 0.000128        | 1.51                     | 1.51                      | Tbc1d7                                                | 0.001003        | 1.77                     | 1.77                      |
| Ptprt                                                 | 0.000007        | 0.64                     | -1.56                     | Tcap                                                  | 0.000035        | 0.33                     | -3.02                     |
| Ptpru                                                 | 0.000005        | 1.62                     | 1.62                      | Tcap                                                  | 0.000752        | 0.55                     | -1.81                     |
|                                                       |                 |                          |                           | Tcf3                                                  | 0.000008        | 1.51                     | 1.51                      |

Supplementary Table 2: continued

| Differentially expressed transcripts due to forskolin | Mean Ratio      | Fold Change |
|-------------------------------------------------------|-----------------|-------------|
| Entrez ID                                             | p-value         | (20 vs. 0)  |
| Tctn3                                                 | 0.000012        | 1.54        |
| Tctn3                                                 | 0.000000        | 2.05        |
| <b>Tgfr3</b>                                          | <b>0.000000</b> | <b>3.72</b> |
| Tgfr3                                                 | 0.002110        | 1.50        |
| Tgm2                                                  | 0.000025        | 0.48        |
| <b>Thbd</b>                                           | <b>0.000091</b> | <b>3.59</b> |
| Thbs1                                                 | 0.000005        | 0.50        |
| Thsd4                                                 | 0.000024        | 0.47        |
| Tia1                                                  | 0.000302        | 1.51        |
| Tmem100                                               | 0.000338        | 1.89        |
| <b>Tmem158</b>                                        | <b>0.000165</b> | <b>0.11</b> |
| Tmem45a                                               | 0.000134        | 1.58        |
| Tmod2                                                 | 0.000005        | 1.80        |
| Tnc                                                   | 0.001404        | 0.58        |
| Tnc                                                   | 0.000002        | 0.57        |
| Tnik                                                  | 0.000012        | 0.53        |
| Tnik                                                  | 0.000147        | 0.48        |
| Tnk2                                                  | 0.004450        | 1.50        |
| Tns3                                                  | 0.000004        | 0.67        |
| Trib2                                                 | 0.000014        | 0.60        |
| Trim2                                                 | 0.000595        | 1.51        |
| Trim47                                                | 0.000206        | 0.54        |
| Trp53inp2                                             | 0.000030        | 1.59        |
| Tsc22d4                                               | 0.003080        | 1.87        |
| Ttll5                                                 | 0.000044        | 1.78        |
| Ttll5                                                 | 0.000165        | 1.60        |
| Twist2                                                | 0.003283        | 1.58        |
| Ube2e2                                                | 0.000508        | 0.57        |
| Uck2                                                  | 0.000010        | 0.62        |
| Uck2                                                  | 0.000436        | 0.61        |
| Ugp2                                                  | 0.000001        | 0.36        |
| Ugt1a10                                               | 0.000147        | 2.43        |
| Ugt1a10                                               | 0.000002        | 2.05        |
| Ugt1a10                                               | 0.000090        | 2.20        |
| Ugt1a6a                                               | 0.000643        | 1.64        |
| Ugt1a6a                                               | 0.000034        | 1.91        |
| Ugt1a6b                                               | 0.000006        | 2.45        |
| Usp6nl                                                | 0.000011        | 1.65        |
| Vamp5                                                 | 0.000475        | 0.60        |
| Vcan                                                  | 0.001572        | 1.97        |
| Vcan                                                  | 0.001250        | 2.28        |
| Vcan                                                  | 0.001253        | 2.09        |
| Vdr                                                   | 0.002828        | 1.91        |
| Vsnl1                                                 | 0.002117        | 0.64        |
| Vstm2b                                                | 0.000515        | 1.66        |
| Wnt10b                                                | 0.000000        | 0.48        |
| Wnt16                                                 | 0.002631        | 0.39        |
| <b>Wnt16</b>                                          | <b>0.000012</b> | <b>0.25</b> |
| <b>Wnt16</b>                                          | <b>0.000001</b> | <b>0.28</b> |
| Xdh                                                   | 0.001479        | 1.62        |
| Ybx3                                                  | 0.001143        | 1.83        |
| Zfp185                                                | 0.001445        | 0.59        |
| Zfp219                                                | 0.000019        | 1.50        |
| Zfp704                                                | 0.000402        | 1.52        |

**Supplementary Table 3: Differential gene expression upon forskolin treatment.** Raw data of the Figure 1. The mRNA expression levels of selected genes was investigated by qRT-PCR. Data were normalized to the expression of 60s. The columns represent the mean value of twelve experimental samples, and the error bars indicate the SEM. n.d.: not detected

|         | 0 $\mu$ M Forskolin |      |      |      |      |      |      |      |      |      |      |      | 20 $\mu$ M Forskolin |       |       |       |       |       |       |       |       |       |       |       | pvalue    |            |           |
|---------|---------------------|------|------|------|------|------|------|------|------|------|------|------|----------------------|-------|-------|-------|-------|-------|-------|-------|-------|-------|-------|-------|-----------|------------|-----------|
|         | 1                   | 2    | 3    | 4    | 5    | 6    | 7    | 8    | 9    | 10   | 11   | 12   | 1                    | 2     | 3     | 4     | 5     | 6     | 7     | 8     | 9     | 10    | 11    | 12    | 0 $\mu$ M | 20 $\mu$ M |           |
| A       |                     |      |      |      |      |      |      |      |      |      |      |      |                      |       |       |       |       |       |       |       |       |       |       |       |           |            |           |
| Sostdc1 | 0.62                | 0.56 | 1.01 | 1.13 | 1.13 | n.d. | 1.45 | 0.79 | 0.67 | 1.26 | 1.15 | 1.24 | 8.42                 | 11.49 | 10.37 | 10.24 | 8.77  | 16.00 | 19.51 | 5.65  | 6.02  | 9.25  | 11.51 | 12.22 | 1.00      | 10.79      | 0.0000028 |
| Plekha4 | 0.25                | n.d. | 0.44 | 0.36 | 0.68 | 0.42 | 0.58 | 0.22 | 5.67 | 0.41 | 0.97 | n.d. | 116.60               | 91.81 | 41.61 | 68.56 | 68.56 | 87.04 | 42.73 | 28.79 | 37.80 | 21.32 | 23.56 | 66.06 | 1.00      | 57.87      | 0.0000416 |
| Spon2   | 1.37                | 1.33 | 1.07 | 1.88 | 1.15 | 1.09 | 1.47 | 0.58 | 0.71 | 0.48 | 0.28 | 0.59 | 6.60                 | 7.49  | 8.31  | 10.47 | 6.94  | 7.07  | 10.85 | 3.92  | 3.41  | 3.74  | 4.39  | 2.09  | 1.00      | 6.27       | 0.0000384 |
| Ccl11   | 1.61                | 0.97 | 0.83 | 0.98 | 0.92 | 1.26 | 1.87 | 1.13 | 0.71 | 0.69 | 0.57 | 0.43 | 23.33                | 18.06 | 39.12 | 25.07 | 25.92 | 30.51 | 27.63 | 13.10 | 14.36 | 14.55 | 14.98 | 18.68 | 1.00      | 22.11      | 0.0000016 |
| Egr3    | 0.48                | 0.53 | 0.53 | 0.94 | 0.59 | 0.67 | 1.11 | 2.15 | 1.47 | 1.03 | 1.33 | 1.19 | 21.55                | 22.41 | 10.59 | 12.71 | 8.41  | 14.10 | 13.26 | 7.80  | 6.75  | 6.68  | 8.03  | 8.44  | 1.00      | 11.73      | 0.0000257 |
| Il11    | 2.30                | 2.94 | 0.72 | 1.30 | 1.29 | 0.81 | 0.86 | 0.32 | 0.39 | 0.36 | 0.38 | 0.33 | 28.29                | 26.59 | 12.02 | 13.05 | 10.11 | 13.28 | 13.05 | 9.08  | 8.11  | 8.79  | 9.24  | 11.26 | 1.00      | 13.57      | 0.0000428 |
| Egfr8   | 0.86                | 0.81 | 0.95 | 1.34 | 1.04 | 0.99 | 1.21 | 1.04 | 0.90 | 0.97 | 0.81 | 1.07 | 6.08                 | 8.14  | 5.39  | 5.46  | 5.20  | 6.35  | 5.43  | 2.66  | 2.85  | 3.19  | 3.29  | 4.59  | 1.00      | 4.89       | 0.0000049 |
| Sorcs1  | 1.48                | 1.40 | 1.14 | 1.40 | 1.21 | 0.89 | 0.97 | 0.93 | 0.58 | 0.67 | 0.58 | 0.75 | 8.30                 | 6.67  | 5.37  | 5.08  | 4.39  | 4.19  | 3.62  | 2.47  | 2.76  | 2.55  | 2.78  | 3.86  | 1.00      | 4.34       | 0.0000398 |
| Gzmd    | 0.29                | 0.53 | 1.99 | 1.98 | 1.45 | 1.44 | 2.23 | 0.50 | 0.70 | 0.44 | 0.35 | 0.10 | 15.35                | 16.63 | 31.22 | 33.38 | 37.01 | 43.68 | 39.01 | 31.01 | 22.35 | 18.70 | 22.78 | 25.48 | 1.00      | 28.05      | 0.0000006 |
| Rassf4  | 0.55                | 0.33 | 1.01 | 1.29 | 1.08 | 1.39 | 1.85 | 0.82 | 0.77 | 0.95 | 1.13 | 0.84 | 1.88                 | 1.69  | 2.41  | 2.74  | 2.04  | 5.97  | 5.31  | 1.49  | 1.83  | 1.95  | 2.83  | 2.93  | 1.00      | 2.76       | 0.0013174 |
| Prss35  | 1.10                | 0.76 | 0.97 | 1.22 | 1.06 | 1.38 | 1.42 | 0.77 | 0.76 | 0.84 | 0.81 | 0.92 | 1.52                 | 1.24  | 1.53  | 1.77  | 1.55  | 2.27  | 2.24  | 1.02  | 1.05  | 1.38  | 1.19  | 1.81  | 1.00      | 1.55       | 0.0009430 |
| Fgf7    | 0.59                | 0.61 | 0.60 | 0.96 | 0.76 | 1.33 | 1.49 | 1.35 | 1.35 | 0.83 | 1.11 | 1.01 | 5.25                 | 4.42  | 5.90  | 6.65  | 4.96  | 6.84  | 7.52  | 6.42  | 5.41  | 5.13  | 5.84  | 7.99  | 1.00      | 6.03       | 0.0000000 |
| Tgfb3   | 1.26                | 0.94 | 1.05 | 1.31 | 1.10 | 1.10 | 1.06 | 0.88 | 1.17 | 0.98 | 0.91 |      | 7.37                 | 7.61  | 5.77  | 5.83  | 4.79  | 5.88  | 4.95  | 3.06  | 3.02  | 3.07  | 3.81  | 4.41  | 1.00      | 4.96       | 0.0000023 |
| Kcnn4   | 1.38                | 1.41 | 0.96 | 1.41 | 1.22 | 0.90 | 0.96 | 0.88 | 0.74 | 0.57 | 0.71 | 0.86 | 7.92                 | 6.56  | 4.87  | 5.35  | 3.88  | 3.83  | 3.13  | 2.12  | 2.03  | 2.23  | 2.79  | 3.42  | 1.00      | 4.01       | 0.0001418 |
| Prss12  | 1.10                | 1.41 | 1.16 | 1.62 | 1.19 | 0.95 | 1.21 | 0.65 | 0.66 | 0.73 | 0.63 | 0.70 | 6.67                 | 7.23  | 7.15  | 6.31  | 4.71  | 7.06  | 16.43 | 3.45  | 3.08  | 3.37  | 4.41  | 4.98  | 1.00      | 6.24       | 0.0003451 |
| Tbhd    | 0.82                | 0.60 | 1.10 | 1.58 | 1.01 | 1.22 | 1.75 | 0.78 | 0.87 | 0.76 | 0.75 | 0.77 | 4.35                 | 5.16  | 6.26  | 8.57  | 6.47  | 9.32  | 9.14  | 5.57  | 4.68  | 5.96  | 6.02  | 7.42  | 1.00      | 6.58       | 0.0000001 |
| Slc24a3 | 0.47                | 0.54 | 0.70 | 1.36 | 1.12 | 0.93 | 1.45 | 1.11 | 1.24 | 0.99 | 1.17 | 0.92 | 5.76                 | 7.63  | 3.55  | 4.87  | 3.18  | 4.85  | 4.99  | 1.87  | 1.92  | 1.63  | 2.38  | 2.83  | 1.00      | 3.79       | 0.0002660 |
| Mpz     | 0.14                | 0.45 | 0.90 | 1.43 | 1.45 | 0.67 | 1.09 | 1.18 | 1.18 | 1.19 | 1.17 | 1.16 | 5.35                 | 7.50  | 7.21  | 16.34 | 5.81  | 7.78  | 6.05  | 5.50  | 5.86  | 7.21  | 6.54  | 7.69  | 1.00      | 7.40       | 0.0000103 |
| Npy5r   | n.d.                | 0.02 | 1.68 | 0.60 | 2.67 | n.d. | 0.09 | 1.29 | 0.58 | 1.34 | 0.89 | 0.83 | 15.62                | 20.27 | 9.39  | 17.23 | 13.40 | 13.77 | 15.01 | 5.05  | 11.83 | 4.42  | 6.39  | 12.71 | 1.00      | 12.09      | 0.0000068 |
| Ednrb   | 0.70                | 0.73 | 1.35 | 1.43 | 1.19 | 1.03 | 1.00 | 0.64 | 0.86 | 1.16 | 0.85 | 1.06 | 3.30                 | 5.67  | 3.27  | 3.86  | 3.06  | 4.45  | 2.60  | 2.24  | 2.27  | 2.63  | 3.43  | 3.17  | 1.00      | 3.33       | 0.0000029 |
| Dcn     | 0.65                | 0.64 | 0.64 | 0.95 | 1.03 | 0.97 | 2.12 | 1.13 | 1.22 | 0.69 | 1.28 | 0.68 | 3.17                 | 3.03  | 3.05  | 3.31  | 2.41  | 3.73  | 6.70  | 2.91  | 2.79  | 2.75  | 3.33  | 3.36  | 1.00      | 3.38       | 0.0000060 |
| B       |                     |      |      |      |      |      |      |      |      |      |      |      |                      |       |       |       |       |       |       |       |       |       |       |       |           |            |           |
| Pde1b   | 1.65                | 1.41 | 0.99 | 1.41 | 1.17 | 0.98 | 0.88 | 0.78 | 0.70 | 0.68 | 0.60 | 0.74 | 0.06                 | 0.07  | 0.03  | 0.05  | 0.04  | 0.05  | 0.03  | 0.03  | 0.02  | 0.02  | 0.03  | 0.04  | 1.00      | 0.04       | 0.0000009 |
| Lrtm1   | 1.97                | 1.92 | 0.95 | 1.33 | 1.32 | 0.61 | 0.93 | 0.73 | 0.62 | 0.56 | 0.48 | 0.56 | 0.46                 | 0.45  | 0.20  | 0.22  | 0.14  | 0.12  | 0.11  | 0.08  | 0.08  | 0.07  | 0.08  | 0.10  | 1.00      | 0.17       | 0.0001747 |
| Pcdh20  | 1.69                | 1.87 | 0.92 | 1.42 | 0.74 | 0.80 | 1.32 | 0.58 | 0.61 | 0.51 | 0.87 | 0.66 | 0.14                 | 0.09  | 0.07  | 0.06  | 0.07  | 0.09  | 0.05  | 0.05  | 0.03  | 0.06  | 0.08  | 0.10  | 1.00      | 0.07       | 0.0000225 |
| Mbp     | 0.56                | 0.68 | 0.97 | 1.50 | 1.19 | 0.73 | 1.12 | 1.07 | 0.92 | 1.10 | 0.97 | 1.19 | 0.03                 | 0.04  | 0.02  | 0.03  | 0.02  | 0.02  | 0.03  | 0.02  | 0.02  | 0.02  | 0.03  | 0.03  | 1.00      | 0.03       | 0.0000000 |
| Tmem158 | 1.42                | 2.18 | 1.00 | 1.48 | 1.27 | 0.69 | 0.87 | 0.83 | 0.68 | 0.53 | 0.54 | 0.49 | 0.27                 | 0.30  | 0.19  | 0.20  | 0.15  | 0.12  | 0.09  | 0.11  | 0.09  | 0.08  | 0.10  | 0.13  | 1.00      | 0.15       | 0.0001108 |
| Stc2    | 1.94                | 1.73 | 0.90 | 1.30 | 1.21 | 0.78 | 0.93 | 0.84 | 0.69 | 0.55 | 0.52 | 0.61 | 0.29                 | 0.28  | 0.13  | 0.16  | 0.11  | 0.12  | 0.10  | 0.07  | 0.06  | 0.05  | 0.07  | 0.09  | 1.00      | 0.13       | 0.0000344 |
| Klhl30  | 1.12                | 1.16 | 1.03 | 1.51 | 1.10 | 1.03 | 1.25 | 0.85 | 0.87 | 0.89 | 0.70 | 0.49 | 0.18                 | 0.19  | 0.14  | 0.19  | 0.17  | 0.15  | 0.13  | 0.11  | 0.08  | 0.07  | 0.09  | 0.13  | 1.00      | 0.14       | 0.0000002 |
| Ppp1r1a | 1.21                | 1.16 | 0.80 | 1.28 | 1.20 | 1.00 | 1.27 | 0.94 | 0.88 | 0.78 | 0.63 | 0.86 | 0.16                 | 0.12  | 0.11  | 0.08  | 0.08  | 0.09  | 0.08  | 0.10  | 0.04  | 0.04  | 0.03  | 0.08  | 1.00      | 0.08       | 0.0000000 |
| Atp1b1  | 2.31                | 1.67 | 0.88 | 1.40 | 1.27 | 0.85 | 0.92 | 0.67 | 0.56 | 0.46 | 0.44 | 0.57 | 0.25                 | 0.20  | 0.16  | 0.15  | 0.14  | 0.13  | 0.12  | 0.07  | 0.08  | 0.07  | 0.08  | 0.09  | 1.00      | 0.13       | 0.0002318 |
| Rcan2   | 2.59                | 1.66 | 0.78 | 1.06 | 1.10 | 0.83 | 0.83 | 0.74 | 0.56 | 0.65 | 0.54 | 0.66 | 0.13                 | 0.12  | 0.09  | 0.09  | 0.09  | 0.07  | 0.05  | 0.04  | 0.04  | 0.04  | 0.06  | 0.06  | 1.00      | 0.07       | 0.0001965 |
| Rgs8    | 1.09                | 0.97 | 0.96 | 1.27 | 1.19 | 1.00 | 0.98 | 0.95 | 0.81 | 0.88 | 0.91 | 0.97 | 0.03                 | 0.02  | 0.02  | 0.02  | 0.02  | 0.02  | 0.02  | 0.01  | 0.01  | 0.01  | 0.02  | 0.02  | 1.00      | 0.02       | 0.0000000 |
| Nme7    | 1.33                | 1.27 | 1.01 | 1.28 | 1.04 | 0.95 | 1.06 | 0.91 | 0.86 | 0.71 | 0.69 | 0.89 | 1.46                 | 1.36  | 0.94  | 1.19  | 0.93  | 0.98  | 0.87  | 0.68  | 0.65  | 0.65  | 0.72  | 1.20  | 1.00      | 0.97       | 0.7640704 |
| Mgp     | 1.39                | 1.48 | 0.67 | 1.21 | 0.90 | 0.76 | 1.36 | 0.96 | 1.01 | 0.66 | 0.93 | 0.66 | 0.19                 | 0.28  | 0.16  | 0.19  | 0.17  | 0.17  | 0.26  | 0.15  | 0.15  | 0.12  | 0.21  | 0.18  | 1.00      | 0.19       | 0.0000010 |
| Wnt16   | 1.10                | 0.93 | 0.94 | 1.20 | 1.18 | 1.07 | 1.21 | 1.09 | 0.75 | 0.86 | 0.75 | 0.92 | 0.50                 | 0.42  | 0.48  | 0.50  | 0.48  | 0.45  | 0.37  | 0.29  | 0.27  | 0.27  | 0.33  | 0.43  | 1.00      | 0.40       | 0.0000000 |
| Klk4    | 2.28                | 1.64 | 0.83 | 1.12 | 1.13 | 0.79 | 0.91 | 0.94 | 0.69 | 0.54 | 0.48 | 0.65 | 0.63                 | 0.52  | 0.39  | 0.44  | 0.37  | 0.37  | 0.25  | 0.19  | 0.16  | 0.17  | 0.20  | 0.29  | 1.00      | 0.33       | 0.0007995 |
| Olig1   | 1.70                | 1.61 | 0.92 | 1.26 | 0.97 | 1.00 | 1.36 | 0.83 | 0.75 | 0.44 | 0.76 | 0.40 | 1.09                 | 1.15  | 0.52  | 0.50  | 0.35  | 0.49  | 0.48  | 0.18  | 0.18  | 0.12  | 0.17  | 0.27  | 1.00      | 0.46       | 0.0002173 |
| Pdgrf   | 0.61                | 0.63 | 0.98 | 1.29 | 1.05 | 1.00 | 1.36 | 0.93 | 0.97 | 1.03 | 1.02 | 1.14 | 0.17                 | 0.17  | 0.17  | 0.40  | 0.22  | 0.34  | 0.33  | 0.14  | 0.13  | 0.14  | 0.18  | 0.26  | 1.00      | 0.22       | 0.0000000 |
| Acn     | 1.16                | 1.01 | 0.93 | 1.28 | 1.24 | 0.95 | 0.95 | 0.79 | 0.69 | 1.35 | 0.74 | 0.92 | 0.04                 | 0.04  | 0.05  | 0.05  | 0.05  | 0.04  | 0.02  | 0.03  | 0.03  | 0.04  | 0.04  | 0.04  | 1.00      | 0.04       | 0.0000000 |
| Fhl1    | 0.43                | 0.85 | 0.85 | 1.09 | 1.06 | 0.83 | 1.46 | 0.95 | 1.10 | 1.08 | 1.08 | 1.24 | 0.22                 | 0.17  | 0.29  | 0.27  | 0.20  | 0.40  | 0.34  | 0.28  | 0.33  | 0.28  | 0.37  | 0.38  | 1.00      | 0.29       | 0.0000005 |
| Cspg4   | 0.68                | 0.58 | 0.78 | 1.20 | 0.97 | 0.90 | 1.26 | 1.21 | 1.16 | 1.02 | 1.07 | 1.16 | 0.12                 | 0.11  | 0.13  | 0.18  | 0.13  | 0.22  | 0.22  | 0.18  | 0.18  | 0.20  | 0.20  | 0.22  | 1.00      | 0.17       | 0.0000000 |
| Cav1    | 0.53                | 0.51 | 0.76 | 1.15 | 1.05 | 1.13 | 1.49 | 1.07 | 0.99 | 0.95 | 1.23 | 1.15 | 0.18                 | 0.20  | 0.29  | 0.31  | 0.26  | 0.47  | 0.47  | 0.42  | 0.36  | 0.58  | 0.47  | 0.72  | 1.00      | 0.39       | 0.0000050 |

**Supplementary Table 4: GO-annotation analysis of differentially expressed genes due to forskolin.** Raw data of the Figure 3. In forskolin-induced (A) and forskolin-reduced transcripts (B), a number of genes were associated with GO-annotations for extracellular matrix, extracellular region and plasma membrane. Several forskolin-reduced genes were associated with intracellular signaling, such as the MAPKKK cascade (B).

**A Induced gene transcripts**

**Molecular Function**

| Category                                                                                                                                                      | Identification | Term                         | Count | %    | p-value  |
|---------------------------------------------------------------------------------------------------------------------------------------------------------------|----------------|------------------------------|-------|------|----------|
| GOTERM_MF_FAT                                                                                                                                                 | GO:0005509~    | calcium ion binding          | 21    | 8.50 | 6.26E-03 |
| <small>GALNT2, SVBP1, NCALD, NID1, MMP15, DLK1, SLIT2, CDH5, SLIT3, THBD, GNPATB, SLC2A3, CACNA1H, RELN, EGFL8, VCAN, SPON2, ENTPD2, PROS1, DST, AOC3</small> |                |                              |       |      |          |
| GOTERM_MF_FAT                                                                                                                                                 | GO:0005125~    | cytokine activity            | 14    | 5.67 | 4.13E-07 |
| <small>BMP4, CXCL1, IL6, GDF1, CXCL1, IL33, KITL, CXCL12, CCL7, IL11, CCL11, CXCL14, PPBP, CCLF1</small>                                                      |                |                              |       |      |          |
| GOTERM_MF_FAT                                                                                                                                                 | GO:0008009~    | chemokine activity           | 7     | 2.83 | 9.46E-06 |
| <small>CCL11, CXCL1, CXCL14, PPBP, CXCL1, CXCL12, CCL7</small>                                                                                                |                |                              |       |      |          |
| GOTERM_MF_FAT                                                                                                                                                 | GO:0008092~    | cytoskeletal protein binding | 15    | 6.07 | 8.96E-04 |
| <small>CLMN, BCL2L11, FARP2, CDRO2B, FMN2, TRIM2, SYN1, TMOO2, MFAP2, EPB4, IL4B, CLASP1, LOC100044177, ADD3, DST, SYNPO</small>                              |                |                              |       |      |          |
| GOTERM_MF_FAT                                                                                                                                                 | GO:0003779~    | actin binding                | 9     | 3.64 | 3.25E-02 |
| <small>CDRO2B, FMN2, SYN1, CLMN, TMOO2, LOC100044177, DST, ADD3, SYNPO</small>                                                                                |                |                              |       |      |          |
| GOTERM_MF_FAT                                                                                                                                                 | GO:0050840~    | extracellular matrix binding | 3     | 1.21 | 4.27E-02 |
| <small>NID1, DCN, SHH</small>                                                                                                                                 |                |                              |       |      |          |

**Cellular Component**

| Category                                                                                                                                                                                                                                                                                                                                                                                                                                                                | Term        | Count                | %  | p-value |          |
|-------------------------------------------------------------------------------------------------------------------------------------------------------------------------------------------------------------------------------------------------------------------------------------------------------------------------------------------------------------------------------------------------------------------------------------------------------------------------|-------------|----------------------|----|---------|----------|
| GOTERM_CC_FAT                                                                                                                                                                                                                                                                                                                                                                                                                                                           | GO:0031012~ | extracellular matrix | 21 | 8.50    | 7.29E-09 |
| <small>BMP4, MATN2, TMOO2, CTRHC1, LUM, ADAMTS15, NID1, MMP15, DCN, PRELP, LAMA1, COL14A1, CRISPLD2, PTN, TGFBR3, RELN, MFAP2, VCAN, SPON2, ENTPD2, PRSS12</small>                                                                                                                                                                                                                                                                                                      |             |                      |    |         |          |
| GOTERM_CC_FAT                                                                                                                                                                                                                                                                                                                                                                                                                                                           | GO:0005576~ | extracellular region | 64 | 25.91   | 1.97E-15 |
| <small>CTRHC1, AEBP1, GDF1, FGF7, CRHBP, CXCL12, SHH, IL11, OLFML3, CCLF1, SOSTDC1, LG4, SEMA3B, SPON2, PRSS5, MATN2, MMP15, SLIT2, SLIT3, PRELP, THBD, PPBP, PLA2G7, STC1, RELN, VCAN, MFAP2, EGFL8, CTSS, PROS1, HSD17B11, CXCL1, GALNT2, DHH, FMOD, LUM, ADAMTS15, CRF1, CX3CL1, DCN, IL33, CCL7, CRISPLD2, C10TNF1, PTN, ENTPD2, PRSS12, PRL2C2, BMP4, IL6, SVBP1, NID1, KITL, SOD3, CCL11, LAMA1, COL14A1, CXCL14, SFRP1, FIX1, LIPH, TGFBR3, PLAU, IGFBP5</small> |             |                      |    |         |          |
| GOTERM_CC_FAT                                                                                                                                                                                                                                                                                                                                                                                                                                                           | GO:0005886~ | plasma membrane      | 51 | 20.65   | 2.76E-02 |
| <small>SLC1A11, FGFRL1, GJA1, DLK1, SHH, EDNRB, UGT1A8, SLC2A3, UGT1A6, GNG2, ROBO2, LOC100041777, CEACAM2, RAP2A, MMP15, PTPRJ, PTPRN, NCAM1, UGT1A10, THBD, SCSM3, CTSS, KCN2, DST, ADD3, PMP21, AOC3, DHH, ITGB4, KXNA, CXCL1, CDH5, ALCAM, IGSF11, SYN1, ITGB8, SYNPO, TMEM5A, LOC100047606, IL6, SMAD3, NPY1R, KITL, NPY5R, CAMK2N1, FZD6, GPR153, SLIT7A8, KCN4, ABC4, TGFBR3, CACNA1H, TNK2</small>                                                              |             |                      |    |         |          |
| GOTERM_CC_FAT                                                                                                                                                                                                                                                                                                                                                                                                                                                           | GO:0005615~ | extracellular space  | 28 | 11.34   | 5.93E-10 |
| <small>CXCL1, DHH, GDF1, CRHBP, IL33, CX3CL1, CXCL12, SHH, CCL7, IL11, CCLF1, SOSTDC1, C10TNF1, PRL2C2, BMP4, IL6, KITL, SLIT2, SOD3, SLIT3, CCL11, THBD, CXCL14, PLA2G7, FIX1, RELN, STC1, IGFBP5</small>                                                                                                                                                                                                                                                              |             |                      |    |         |          |

**Biological Process**

| Category                                                                                                                                                                    | Term        | Count                                  | %  | p-value |          |
|-----------------------------------------------------------------------------------------------------------------------------------------------------------------------------|-------------|----------------------------------------|----|---------|----------|
| GOTERM_BP_FAT                                                                                                                                                               | GO:0010628~ | positive regulation of gene expression | 12 | 4.86    | 7.48E-02 |
| <small>BMP4, HDAC4, IL6, CEBPB, KIF13, GLIS1, BCL3, SMAD3, RORR, SHH, IL11, PRL2C2</small>                                                                                  |             |                                        |    |         |          |
| GOTERM_BP_FAT                                                                                                                                                               | GO:0007155~ | cell adhesion                          | 22 | 8.91    | 2.82E-05 |
| <small>AEBP1, SVBP1, ITGB4, NID1, CX3CL1, PTPRJ, KITL, LOC10005228, CDH5, BCL2L11, ALCAM, NCAM1, LAMA1, IGSF11, COL14A1, ITGB8, RELN, ROBO2, VCAN, SPON2, DST, AOC3</small> |             |                                        |    |         |          |
| GOTERM_BP_FAT                                                                                                                                                               | GO:0016477~ | cell migration                         | 10 | 4.05    | 5.42E-03 |
| <small>EDNRB, GJA1, RELN, CX3CL1, NR2F2, CXCL12, KITL, PLAU, SHH, CCLK1</small>                                                                                             |             |                                        |    |         |          |
| GOTERM_BP_FAT                                                                                                                                                               | GO:0042127~ | regulation of cell proliferation       | 13 | 5.26    | 6.71E-02 |
| <small>BMP4, IL6, FGF7, FGFRL1, SMAD3, KITL, SHH, CDH5, IL11, HDAC4, TGFBR3, PLAU, PRL2C2</small>                                                                           |             |                                        |    |         |          |
| GOTERM_BP_FAT                                                                                                                                                               | GO:0007267~ | cell-cell signaling                    | 13 | 5.26    | 6.81E-04 |
| <small>BMP4, DHH, IL6, EGR3, FGF7, GJA1, FZD2, LOC100045228, SHH, NPY5R, SYN1, TMOO2, PPP3CA</small>                                                                        |             |                                        |    |         |          |

**B Reduced gene transcripts**

**Molecular Function**

| Category                                                                                                                                                                 | Term        | Count               | %  | p-value |          |
|--------------------------------------------------------------------------------------------------------------------------------------------------------------------------|-------------|---------------------|----|---------|----------|
| GOTERM_MF_FAT                                                                                                                                                            | GO:0005509~ | calcium ion binding | 21 | 9.17    | 4.67E-03 |
| <small>PCDH20, ITGA1, ANXA1, MGP, PADI2, MMP17, LPCA12, PCDH17, CALB2, MYL9, GALNT14, ITGA5, GSN, LOC638935, CDH19, VSNL1, TGM2, THBS1, CDH10, SNTA1, EHD4, DTNA</small> |             |                     |    |         |          |

**Cellular Component**

| Category                                                                                                                                                                                                                                                                                                                                                                                                   | Term        | Count                | %  | p-value |          |
|------------------------------------------------------------------------------------------------------------------------------------------------------------------------------------------------------------------------------------------------------------------------------------------------------------------------------------------------------------------------------------------------------------|-------------|----------------------|----|---------|----------|
| GOTERM_CC_FAT                                                                                                                                                                                                                                                                                                                                                                                              | GO:0031012~ | extracellular matrix | 18 | 7.86    | 3.98E-07 |
| <small>WNT16, WNT10B, PTPR21, TNC, ADAMTS15, COL15A1, CDC80, COL28A1, MMP17, COL5A2, COL4A5, THSD4, ACAN, TGM2, ADAMTS12, AGRN, ADAMTS12, COL8A1</small>                                                                                                                                                                                                                                                   |             |                      |    |         |          |
| GOTERM_CC_FAT                                                                                                                                                                                                                                                                                                                                                                                              | GO:0005576~ | extracellular region | 39 | 17.03   | 2.33E-04 |
| <small>WNT16, PDGFR, PDGFA, PGF, TNC, ADAMTS15, CD109, COL28A1, GDNF, FAM132B, C10TNF3, GSN, TGM2, ACAN, LOKL4, ADAMTS12, AGRN, HTRA3, COL8A1, THBS1, KLB3, WNT10B, STC2, PTPR21, COL15A1, CDC80, IGF1, MMP17, MGP, ENDOD1, COL5A2, COL4A5, 1190002V19R1K, SRPZ, THSD4, NPB, ADAMTS1, PRSS23, IGFBP5</small>                                                                                               |             |                      |    |         |          |
| GOTERM_CC_FAT                                                                                                                                                                                                                                                                                                                                                                                              | GO:0005604~ | basement membrane    | 9  | 3.93    | 3.82E-06 |
| <small>TNC, ACAN, COL15A1, CDC80, COL28A1, ADAMTS1, AGRN, COL8A1, COL4A5</small>                                                                                                                                                                                                                                                                                                                           |             |                      |    |         |          |
| GOTERM_CC_FAT                                                                                                                                                                                                                                                                                                                                                                                              | GO:0005886~ | plasma membrane      | 54 | 23.58   | 2.29E-03 |
| <small>LOC100047619, VYPD1, ATP1B1, GABRB3, CSPG4, LGRA, KCN12, CALB2, MCF2L, MIP, DIRAS1, DYSF, DES, SV2B, RHOC, GPR176, INPPL1, CRYAB, RFXP3, IMDGA2, MMP17, RETN1, TNS3, CD80, GPBAR1, VAMP5, HSPB1, GAP43, ACVR1, CAV1, LIMS2, PCDH20, CD109, ITGB5, PTK2, P2RY1, TGM2, PPAP2A, DTNA, CNKSR2, IRGM1, FLT1, ANXA1, ITGA1, ATP1A2, PCDH17, ABCB4, P2RX5, ITGA5, RGS3, CDH19, CD200, CDH10, SNTA1</small> |             |                      |    |         |          |
| GOTERM_CC_FAT                                                                                                                                                                                                                                                                                                                                                                                              | GO:0008305~ | integrin complex     | 3  | 1.31    | 4.90E-02 |
| <small>ITGA5, ITGA1, ITGB5</small>                                                                                                                                                                                                                                                                                                                                                                         |             |                      |    |         |          |

**Biological Process**

| Category                                                                                                                                                                            | Term        | Count                                  | %  | p-value |          |
|-------------------------------------------------------------------------------------------------------------------------------------------------------------------------------------|-------------|----------------------------------------|----|---------|----------|
| GOTERM_BP_FAT                                                                                                                                                                       | GO:0010628~ | positive regulation of gene expression | 11 | 4.80    | 8.37E-02 |
| <small>MEF2C, WNT10B, ETS1, MEK1, IRF6, JUN, FOXO1, IGF1, CREB3, AGRN, HMG1A1</small>                                                                                               |             |                                        |    |         |          |
| GOTERM_BP_FAT                                                                                                                                                                       | GO:0007242~ | intracellular signaling cascade        | 22 | 9.61    | 4.75E-03 |
| <small>CNKSR2, S430435Z81K, CAV1, TNK1, ROP3, STMN4, CSPG4, SP9B, PEAI5A, RASL1A, RASL12, RAN2, MCF2L, TNS3, DIRAS1, NUPR1, DOK5, GAB1, TGM2, GUCY1A3, MAPK9, RHOC, GADD45B</small> |             |                                        |    |         |          |
| GOTERM_BP_FAT                                                                                                                                                                       | GO:0000165~ | MAPKKK cascade                         | 6  | 2.62    | 1.39E-02 |
| <small>CAV1, DOK5, GAB1, CSPG4, MAPK9, GADD45B</small>                                                                                                                              |             |                                        |    |         |          |
| GOTERM_BP_FAT                                                                                                                                                                       | GO:0007155~ | cell adhesion                          | 14 | 6.11    | 2.30E-02 |
| <small>INPPL1, PCDH20, TNC, ITGA1, COL15A1, COL28A1, ITGB5, PCDH17, ITGA5, CDH19, ACAN, THBS1, COL8A1, CDH10</small>                                                                |             |                                        |    |         |          |
| GOTERM_BP_FAT                                                                                                                                                                       | GO:0016477~ | cell migration                         | 11 | 4.80    | 8.43E-04 |
| <small>TNS3, PTK2, FLT1, PDGFR, PLXNA2, CSPG4, ITGA1, PRKG1, APBB2, GDNF, ACVR1</small>                                                                                             |             |                                        |    |         |          |
| GOTERM_BP_FAT                                                                                                                                                                       | GO:0042127~ | regulation of cell proliferation       | 16 | 6.99    | 2.94E-03 |
| <small>CAV1, PDGFR, PDGFA, INPPL1, ANXA1, IGF1, FOXO1, PMAHP1, TNS3, CDKN1A, NUPR1, CD80, IRF6, JUN, TGM2, IGFBP3</small>                                                           |             |                                        |    |         |          |
| GOTERM_BP_FAT                                                                                                                                                                       | GO:0007267~ | cell-cell signaling                    | 10 | 4.37    | 1.04E-02 |
| <small>KLB3, PTK2, WNT10B, GABRB3, PDGFA, TNC, SV2B, AGRN, ATP1A2, GDNF</small>                                                                                                     |             |                                        |    |         |          |
